# Supplementary material for: Light-induced magnetic switching in a coumarin-based Tb single molecule magnet
Source: Royal Society of Chemistry journal article supplement (doi:10.1039/d4tc03152k), 2024-11-08
Supplement: d4tc03152k1.pdf [file d4tc03152k1.pdf]

## ***Supplementary Information***

### **Light-induced magnetic switching in a coumarin-based Tb Single Molecule Magnet**

E. Bartolomé,<sup>a\*</sup> A. Arauzo,<sup>b\*</sup> J. Luzón,<sup>c</sup> L. Gasque<sup>d</sup>

<sup>a</sup> Institut de Ciència de Materials de Barcelona (ICMAB-CSIC), Campus UAB, 08193-Bellaterra, Barcelona, Spain; [ebartolome@icmab.es](mailto:ebartolome@icmab.es)

<sup>b</sup> Instituto de Nanociencia y Materiales de Aragón (INMA), CSIC-Universidad de Zaragoza, and Departamento de Física de la Materia Condensada, 50009 Zaragoza, Spain; [aarauzo@unizar.es](mailto:aarauzo@unizar.es)

<sup>c</sup> Centro Universitario de Defensa (CUD), Universidad de Zaragoza, Spain.

<sup>d</sup> Facultad de Química, Universidad Nacional Autónoma de México, Avenida Universidad 3000, CDMX 04510, México.

**S1. Crystal structure and magnetic relaxation of Tb-batho**

**S2. Additional magneto-optical measurements**

**S3. Additional *Ab initio* calculation results**

## S1. Crystal structure and magnetic relaxation of Tb-batho

**Table S1.** Crystal data for **Tb-batho** compound.<sup>92</sup>

|                                                                                      | <b>Tb-batho</b>                                                         |
|--------------------------------------------------------------------------------------|-------------------------------------------------------------------------|
| CCDC deposition                                                                      | CCDC-2013258                                                            |
| Formula                                                                              | C <sub>58.4</sub> H <sub>41.2</sub> N <sub>2</sub> O <sub>12.7</sub> Tb |
| fw                                                                                   | 1133.05                                                                 |
| Crystal size (mm <sup>3</sup> )                                                      | 0.40×0.14×0.03                                                          |
| Colour                                                                               | colourless                                                              |
| Space group                                                                          | <i>P</i> -1                                                             |
| <i>a</i> (Å)                                                                         | 11.6630(4)                                                              |
| <i>b</i> (Å)                                                                         | 13.2469(6)                                                              |
| <i>c</i> (Å)                                                                         | 18.3330(8)                                                              |
| $\alpha$ (°)                                                                         | 78.553(3)                                                               |
| $\beta$ (°)                                                                          | 76.079(3)                                                               |
| $\gamma$ (°)                                                                         | 68.680(3)                                                               |
| <i>V</i> (Å <sup>3</sup> )                                                           | 2541.72(19)                                                             |
| <i>Z</i> , <i>Z'</i>                                                                 | 2, 1                                                                    |
| Diffractometer                                                                       | Stadivari                                                               |
| Radiation                                                                            | Ag- <i>K</i> $\alpha$                                                   |
| <i>T</i> (K)                                                                         | 295(1)                                                                  |
| Density (g.cm <sup>-3</sup> )                                                        | 1.480                                                                   |
| Abs. coef. (mm <sup>-1</sup> )                                                       | 0.786                                                                   |
| Transmission fact.                                                                   | 0.4071 -1.0000                                                          |
| Refl. collected                                                                      | 73159                                                                   |
| Sen $\theta/\lambda$ (Å <sup>-1</sup> )                                              | 0.68                                                                    |
| <i>R</i> <sub>int</sub> (%)                                                          | 10.07                                                                   |
| Completeness (%)                                                                     | 99.8                                                                    |
| Data/parameters                                                                      | 13480 / 681                                                             |
| Restraints                                                                           | 1                                                                       |
| <i>R</i> <sub>1</sub> , <i>wR</i> <sub>2</sub> [ <i>I</i> > 2 $\sigma$ ( <i>I</i> )] | 4.17, 7.50                                                              |
| <i>R</i> <sub>1</sub> , <i>wR</i> <sub>2</sub> [all data]                            | 7.96, 8.24                                                              |
| GOF on <i>F</i> <sup>2</sup>                                                         | 0.795                                                                   |

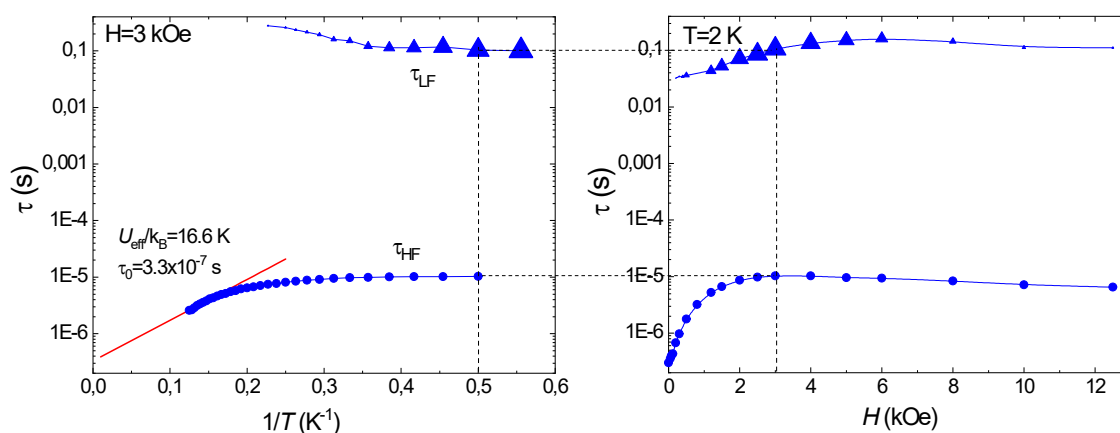

**Figure S1.** Relaxation time as a function of the inverse temperature,  $\tau(1/T)$ , at 3 kOe (a), and as a function of the magnetic field at 2 K.

## S2. Additional magneto-optical measurements

Light-induced dc magnetic switching experiments were performed on two pellets of similar diameter (2.5 mm) but different thicknesses: 0.05 mm (pellet 1) and 0.1 mm (pellet 2). Results for pellet 1 are presented in the main text, while data for pellet 2 are shown here. Qualitatively, both pellets exhibit a similar phenomenology. Magnetization versus time  $M(t)$  experiments at  $T = 1.8$  K,  $H = 1$  kOe, with the lamp alternately switched 'Off' and 'On' (Figure S2a), confirm the observed switching effect observed in pellet 1.

The maximum magnetization modulation,  $\Delta M(\text{Off/On})$ , occurs under optimal irradiation at 380 nm (Figure S2a, b), reaching a value of  $\Delta M(\text{Off/On}) = 0.024 \mu_B/\text{fu}$  (approximately 3% of the magnetization at 1.8 K). This smaller modulation, compared to that of pellet 1, suggests that not all of the sample contributes to the effect in pellet 2. Comparing  $\Delta M(\text{Off/On})$  to the *ab initio* calculated maximum possible change,  $\Delta M^{\text{max}}$ , indicates that the excited population level in this case may reach, at most, 5%.

The Off/On switching experiments under 275 nm light at  $H = 1$  kOe and temperatures of  $T = 1.8$  K and 300 K are compared in Figure S2d. At room temperature, the light-induced change in magnetization is either not detected or falls below the measurement noise threshold ( $< 6 \times 10^{-4} \mu_B/\text{fu}$ ).

To study the influence of the applied dc magnetic field on the light-induced magnetization change, we performed time-dependent magnetization measurements while switching the light "Off" and "On" at 1.8 K under an increased field of 10 kOe (Figure S3a). The magnetization switching is reproduced, with a maximum response observed under 380 nm illumination; however, the magnitude of the change is reduced, reaching

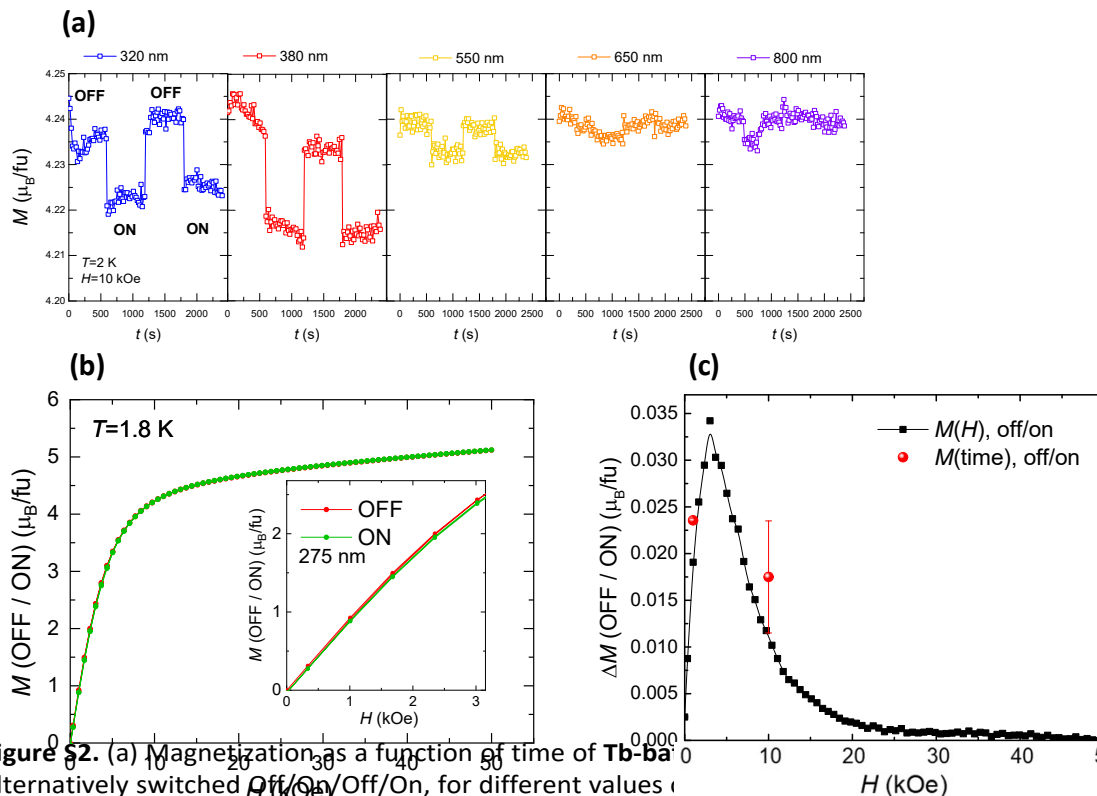

**Figure S2.** (a) Magnetization as a function of time of Tb-ba<sub>2</sub> alternately switched Off/On/Off/On, for different values of incident light wavelength (320 nm and 800 nm); (b) Magnetization change between the Off and On value as a function of the applied magnetic field at  $T=1.8$  K,  $H=10$  kOe and the lamp is alternately switched Off/On/Off/On for different values of the incident light wavelength (320 nm and 800 nm); (c) Magnetization change between Off/On (275 nm) as a function of magnetic field. Measurements conducted on pellet 2.

$\Delta M(\text{Off/On}) = 0.018 \mu_B/\text{fu}$ . Additionally, we measured the field-dependence of the magnetization,  $M(H)$ , with the light alternately switched “Off” and “On” (250 nm) at  $T = 1.8 \text{ K}$  (Figure S3b). The difference between the two curves,  $\Delta M(\text{Off/On})(H)$ , is plotted in Fig. S3c. The light-induced magnetization change reaches its peaks at 3 kOe for this wavelength, becoming almost negligible above 25 kOe.

### S3. Additional *Ab initio* calculation results

**Table S2.** *Ab initio* calculated energy levels of Tb(III) in **Tb-batho** for the  $^7F_J$  ( $J=0-6$ ) multiplets and first excited  $^5D_4$  multiplet.

| $2S+1L_J$          | Energy (K)         |
|--------------------|--------------------|
| $^5D_4$            | 33997.21664        |
|                    | 33989.50949        |
|                    | 33984.35907        |
|                    | 33963.11122        |
|                    | 33948.27776        |
|                    | 33932.73369        |
|                    | 33927.80613        |
|                    | <b>33869.40983</b> |
| <b>33868.74525</b> |                    |
| $^7F_0$            | 8826.87077         |
| $^7F_1$            | 8553.25433         |
|                    | 8542.39797         |
|                    | 8365.71889         |
| $^7F_2$            | 7980.65479         |
|                    | 7900.79366         |
|                    | 7785.06431         |
|                    | 7754.33385         |
|                    | 7549.2645          |
| $^7F_3$            | 6785.46106         |
|                    | 6768.35245         |
|                    | 6743.24477         |
|                    | 6701.34501         |
|                    | 6648.12027         |
|                    | 6629.61806         |
|                    | 6612.03206         |
| $^7F_4$            | 5422.86238         |
|                    | 5376.62511         |
|                    | 5339.97419         |
|                    | 5318.96345         |
|                    | 5209.72806         |
|                    | 5129.38149         |
|                    | 5059.0693          |
|                    | 5049.72553         |
|                    | 5028.79306         |
| $^7F_5$            | 3472.9261          |
|                    | 3455.85534         |
|                    | 3375.35294         |
|                    | 3354.26062         |
|                    | 3323.40945         |
|                    | 3294.49747         |
|                    | 3278.68693         |
|                    | 3242.05558         |
|                    | 3163.9748          |
|                    | 3062.27088         |
| 3045.41824         |                    |
| $^7F_6$            | 523.30643          |
|                    | 521.34364          |
|                    | 396.99394          |
|                    | 386.11542          |
|                    | 342.2582           |
|                    | 318.6539           |
|                    | 307.03196          |
|                    | 219.84885          |
|                    | 216.61935          |
|                    | 122.9253           |
|                    | 122.70315          |
|                    | <b>0.14302</b>     |
|                    | <b>0</b>           |

**Table S3** *Ab initio* calculated energy levels of **Tb-batho** and eigenstates of Tb(III) in terms of the free ion wave functions, for the  $^7F_6$  ground multiplet. The numbers in the table indicate the weight of the  $|+M_J\rangle$  and  $|-M_J\rangle$  states.

| Levels             | Energy (K) | $ -6\rangle$ | $ -5\rangle$ | $ -4\rangle$ | $ -3\rangle$ | $ -2\rangle$ | $ -1\rangle$ | $ 0\rangle$ | $ +1\rangle$ | $ +2\rangle$ | $ +3\rangle$ | $ +4\rangle$ | $ +5\rangle$ | $ +6\rangle$ |
|--------------------|------------|--------------|--------------|--------------|--------------|--------------|--------------|-------------|--------------|--------------|--------------|--------------|--------------|--------------|
| $ \xi_0\rangle$    | 0          | 0.25         | 0.17         | 0.05         | 0.02         | 0.01         | 0.00         | 0.00        | 0.00         | 0.01         | 0.02         | 0.05         | 0.17         | 0.25         |
| $ \xi_1\rangle$    | 0.143      | 0.25         | 0.17         | 0.05         | 0.02         | 0.01         | 0.00         | 0.00        | 0.00         | 0.01         | 0.02         | 0.05         | 0.17         | 0.25         |
| $ \xi_2\rangle$    | 122.70     | 0.01         | 0.06         | 0.13         | 0.13         | 0.07         | 0.10         | 0.00        | 0.10         | 0.07         | 0.13         | 0.13         | 0.06         | 0.01         |
| $ \xi_3\rangle$    | 122.93     | 0.01         | 0.06         | 0.13         | 0.12         | 0.12         | 0.02         | 0.08        | 0.02         | 0.12         | 0.12         | 0.13         | 0.06         | 0.01         |
| $ \xi_4\rangle$    | 216.62     | 0.18         | 0.10         | 0.14         | 0.03         | 0.02         | 0.03         | 0.00        | 0.03         | 0.02         | 0.03         | 0.14         | 0.10         | 0.18         |
| $ \xi_5\rangle$    | 219.85     | 0.18         | 0.09         | 0.15         | 0.04         | 0.02         | 0.01         | 0.02        | 0.01         | 0.02         | 0.04         | 0.15         | 0.09         | 0.18         |
| $ \xi_6\rangle$    | 307.03     | 0.04         | 0.13         | 0.09         | 0.07         | 0.08         | 0.04         | 0.10        | 0.04         | 0.08         | 0.07         | 0.09         | 0.13         | 0.04         |
| $ \xi_7\rangle$    | 318.65     | 0.05         | 0.14         | 0.09         | 0.12         | 0.05         | 0.09         | 0.02        | 0.09         | 0.05         | 0.12         | 0.09         | 0.14         | 0.05         |
| $ \xi_8\rangle$    | 342.26     | 0.01         | 0.03         | 0.07         | 0.12         | 0.11         | 0.14         | 0.04        | 0.14         | 0.11         | 0.12         | 0.07         | 0.03         | 0.01         |
| $ \xi_9\rangle$    | 286.12     | 0.01         | 0.02         | 0.05         | 0.08         | 0.09         | 0.18         | 0.14        | 0.18         | 0.09         | 0.08         | 0.05         | 0.02         | 0.01         |
| $ \xi_{10}\rangle$ | 396.99     | 0.01         | 0.01         | 0.02         | 0.10         | 0.08         | 0.11         | 0.34        | 0.11         | 0.08         | 0.10         | 0.02         | 0.01         | 0.01         |
| $ \xi_{11}\rangle$ | 521.34     | 0.00         | 0.00         | 0.01         | 0.11         | 0.10         | 0.20         | 0.16        | 0.20         | 0.10         | 0.11         | 0.01         | 0.00         | 0.00         |
| $ \xi_{12}\rangle$ | 523.31     | 0.00         | 0.00         | 0.02         | 0.03         | 0.25         | 0.16         | 0.08        | 0.16         | 0.25         | 0.03         | 0.02         | 0.00         | 0.00         |
